# Supplementary material for: Proteomic Analysis of Skin Invasion by Blood Fluke Larvae
Source: PLoS Negl Trop Dis. 2008 Jul 16;2(7):e262. doi: 10.1371/journal.pntd.0000262 (PMC2467291; doi:10.1371/journal.pntd.0000262)
Supplement: Table S6 — Mass spec data and unique sequences of proteins from Table 2, 30 minute exposure. (0.07 MB XLS) [file pntd.0000262.s007.xls]

## Sheet: table 3
S6 Human proteins identified in the 30min-cercarial exposure experiment listed in the same order as Table2 .
In Table 2 all CID spectra were counted, here each unique sequence is listed only once.
"m" stands for methionine sulfoxide; "q" stands for pyroglutamic acid
Acc.#	unique peptides	% cov	m/z	z	mass error [Da]	sequence	score	exp.	MW	species	name
P01023	13	13.8	1030.99	2	-0.043	AFQPFFVELTmPYSVIR	41.1	8.4e-07	163279	HUMAN	Alpha-2-macroglobulin precursor
P01023	13	13.8	783.364	2	-0.056	ALLAYAFALAGNQDK	28.2	0.0044	163279	HUMAN	Alpha-2-macroglobulin precursor
P01023	13	13.8	922.912	2	-0.11	LLIYAVLPTGDVIGDSAK	39.5	2.6e-05	163279	HUMAN	Alpha-2-macroglobulin precursor
P01023	13	13.8	1031.05	2	0.0019	LLLQQVSLPELPGEYSmK	26	0.0066	163279	HUMAN	Alpha-2-macroglobulin precursor
P01023	13	13.8	605.774	2	-0.051	LPPNVVEESAR	18.8	0.059	163279	HUMAN	Alpha-2-macroglobulin precursor
P01023	13	13.8	632.776	2	-0.06	LSFYYLImAK	28.3	0.024	163279	HUMAN	Alpha-2-macroglobulin precursor
P01023	13	13.8	697.799	2	-0.044	NEDSLVFVQTDK	27	0.0032	163279	HUMAN	Alpha-2-macroglobulin precursor
P01023	13	13.8	574.763	2	-0.051	QGIPFFGQVR	22.8	0.0067	163279	HUMAN	Alpha-2-macroglobulin precursor
P01023	13	13.8	1238.06	2	-0.056	SLFTDLEAENDVLHCVAFAVPK	26.4	0.00055	163279	HUMAN	Alpha-2-macroglobulin precursor
P01023	13	13.8	857.361	2	-0.061	SSSNEEVmFLTVQVK	28.9	0.003	163279	HUMAN	Alpha-2-macroglobulin precursor
P01023	13	13.8	836.915	2	-0.017	TEHPFTVEEFVLPK	31.8	0.00011	163279	HUMAN	Alpha-2-macroglobulin precursor
P01023	13	13.8	942.426	2	-0.1	VSVQLEASPAFLAVPVEK	29.4	0.0043	163279	HUMAN	Alpha-2-macroglobulin precursor
P01023	13	13.8	942.74	3	-0.078	VVSmDENFHPLNELIPLVYIQDPK	32.5	0.027	163279	HUMAN	Alpha-2-macroglobulin precursor
P01009	11	34.7	1145.99	2	-0.08	GTEAAGAmFLEAIPmSIPPEVK	16.6	0.051	46736.9	HUMAN	Alpha-1-antitrypsin precursor
P01009	11	34.7	821.321	2	-0.11	ITPNLAEFAFSLYR	23.6	0.0017	46736.9	HUMAN	Alpha-1-antitrypsin precursor
P01009	11	34.7	902.444	2	-0.04	LQHLENELTHDIITK	30.3	0.0007	46736.9	HUMAN	Alpha-1-antitrypsin precursor
P01009	11	34.7	555.749	2	-0.057	LSITGTYDLK	33.6	0.0066	46736.9	HUMAN	Alpha-1-antitrypsin precursor
P01009	11	34.7	1054.06	2	-0.047	LSITGTYDLKSVLGQLGITK	26	0.00024	46736.9	HUMAN	Alpha-1-antitrypsin precursor
P01009	11	34.7	1029.45	2	-0.026	LYHSEAFTVNFGDTEEAK	37.3	6.9e-07	46736.9	HUMAN	Alpha-1-antitrypsin precursor
P01009	11	34.7	1093.45	2	-0.078	LYHSEAFTVNFGDTEEAKK	23.7	0.00013	46736.9	HUMAN	Alpha-1-antitrypsin precursor
P01009	11	34.7	731.837	2	-0.025	qINDYVEKGTQGK	23.6	0.0077	46736.9	HUMAN	Alpha-1-antitrypsin precursor
P01009	11	34.7	508.245	2	-0.066	SVLGQLGITK	31.1	0.025	46736.9	HUMAN	Alpha-1-antitrypsin precursor
P01009	11	34.7	1287.6	2	-0.079	TLNQPDSQLQLTTGNGLFLSEGLK	28.2	0.00022	46736.9	HUMAN	Alpha-1-antitrypsin precursor
P01009	11	34.7	917.399	2	-0.066	VFSNGADLSGVTEEAPLK	37	0.0014	46736.9	HUMAN	Alpha-1-antitrypsin precursor
P05155	2	7.8	593.303	2	-0.051	FQPTLLTLPR	27.2	0.029	55154.7	HUMAN	Plasma protease C1 inhibitor precursor
P05155	2	7.8	1028.14	3	-0.069	KVETNmAFSPFSIASLLTQVLLGAGENTK	34.6	0.025	55154.7	HUMAN	Plasma protease C1 inhibitor precursor
P01011	4	15.8	482.161	2	1.4	ADLSGITGAR	19.6	0.0044	47651.3	HUMAN	Alpha-1-antichymotrypsin precursor
P01011	4	15.8	954.394	2	-0.089	AVLDVFEEGTEASAATAVK	23.8	0.072	47651.3	HUMAN	Alpha-1-antichymotrypsin precursor
P01011	4	15.8	1148.46	2	-0.12	DYNLNDILLQLGIEEAFTSK	21.2	0.0018	47651.3	HUMAN	Alpha-1-antichymotrypsin precursor
P01011	4	15.8	946.383	2	-0.056	LYGSEAFATDFQDSAAAK	24.6	0.0027	47651.3	HUMAN	Alpha-1-antichymotrypsin precursor
P01008	3	10.6	1145.99	2	-0.09	AFLEVNEEGSEAAASTAVVIAGR	25.5	0.003	52602.9	HUMAN	Antithrombin-III precursor
P01008	3	10.6	703.275	2	-0.1	EVPLNTIIFmGR	19.5	0.023	52602.9	HUMAN	Antithrombin-III precursor
P01008	3	10.6	837.843	2	-0.083	LQPLDFKENAEQSR	15.2	0.1	52602.9	HUMAN	Antithrombin-III precursor
P02768	41	62.2	686.241	2	-0.046	AAFTECCQAADK	32.2	0.00083	69367.4	HUMAN	Serum albumin precursor
P02768	41	62.2	825.919	2	-0.032	AEFAEVSKLVTDLTK	39.6	1.2e-05	69367.4	HUMAN	Serum albumin precursor
P02768	41	62.2	830.741	3	-0.026	ALVLIAFAQYLQQCPFEDHVK	33.1	0.0013	69367.4	HUMAN	Serum albumin precursor
P02768	41	62.2	679.768	2	-0.05	AVmDDFAAFVEK	35.4	7.6e-06	69367.4	HUMAN	Serum albumin precursor
P02768	41	62.2	671.751	2	-0.07	AVMDDFAAFVEK	34.8	9.3e-06	69367.4	HUMAN	Serum albumin precursor
P02768	41	62.2	569.729	2	-0.024	CCTESLVNR	21.6	0.038	69367.4	HUMAN	Serum albumin precursor
P02768	41	62.2	575.271	2	-0.02	DAHKSEVAHR	24.2	0.0012	69367.4	HUMAN	Serum albumin precursor
P02768	41	62.2	470.709	2	-0.019	DDNPNLPR	21.8	0.084	69367.4	HUMAN	Serum albumin precursor
P02768	41	62.2	820.322	2	-0.072	DVFLGmFLYEYAR	37	3e-06	69367.4	HUMAN	Serum albumin precursor
P02768	41	62.2	1130.46	2	-0.051	EFNAETFTFHADICTLSEK	26.8	8.1e-05	69367.4	HUMAN	Serum albumin precursor
P02768	41	62.2	849.015	3	-0.045	EFNAETFTFHADICTLSEKER	31.2	0.017	69367.4	HUMAN	Serum albumin precursor
P02768	41	62.2	613.801	2	-0.0049	FKDLGEENFK	29.9	0.0047	69367.4	HUMAN	Serum albumin precursor
P02768	41	62.2	626.805	2	-0.027	FPKAEFAEVSK	30.4	0.0042	69367.4	HUMAN	Serum albumin precursor
P02768	41	62.2	480.763	2	-0.022	FQNALLVR	25.6	0.037	69367.4	HUMAN	Serum albumin precursor
P02768	41	62.2	656.351	2	-0.024	HPDYSVVLLLR	20.6	0.0089	69367.4	HUMAN	Serum albumin precursor
P02768	41	62.2	871.9	2	-0.051	HPYFYAPELLFFAK	27	0.0005	69367.4	HUMAN	Serum albumin precursor
P02768	41	62.2	633.65	3	-0.02	HPYFYAPELLFFAKR	31.1	0.035	69367.4	HUMAN	Serum albumin precursor
P02768	41	62.2	570.81	2	-0.54	KLVAASQAALGL	19.9	0.0011	69367.4	HUMAN	Serum albumin precursor
P02768	41	62.2	564.857	2	0.004	KQTALVELVK	27.4	0.028	69367.4	HUMAN	Serum albumin precursor
P02768	41	62.2	820.401	2	-0.071	KVPQVSTPTLVEVSR	31.4	9.2e-06	69367.4	HUMAN	Serum albumin precursor
P02768	41	62.2	528.272	2	-0.026	KYLYEIAR	20.6	0.058	69367.4	HUMAN	Serum albumin precursor
P02768	41	62.2	648.821	2	-0.035	LAKTYETTLEK	21.1	0.024	69367.4	HUMAN	Serum albumin precursor
P02768	41	62.2	508.245	2	0.94	LVAASQAALGL	25.2	4.7e-05	69367.4	HUMAN	Serum albumin precursor
P02768	41	62.2	575.268	2	-0.043	LVNEVTEFAK	32.8	0.00015	69367.4	HUMAN	Serum albumin precursor
P02768	41	62.2	1158.49	2	-0.065	NYAEAKDVFLGmFLYEYAR	28.3	4.8e-05	69367.4	HUMAN	Serum albumin precursor
P02768	41	62.2	820.776	2	-0.091	qNCELFEQLGEYK	36.7	0.00016	69367.4	HUMAN	Serum albumin precursor
P02768	41	62.2	829.34	2	-0.04	QNCELFEQLGEYK	37.7	0.00022	69367.4	HUMAN	Serum albumin precursor
P02768	41	62.2	1291.63	2	-0.01	qNCELFEQLGEYKFQNALLVR	41	6.3e-06	69367.4	HUMAN	Serum albumin precursor
P02768	41	62.2	1300.14	2	-0.014	QNCELFEQLGEYKFQNALLVR	21.4	0.003	69367.4	HUMAN	Serum albumin precursor
P02768	41	62.2	734.428	2	0.0033	RHPDYSVVLLLR	28.4	0.00075	69367.4	HUMAN	Serum albumin precursor
P02768	41	62.2	949.972	2	-0.03	RHPYFYAPELLFFAK	34.9	5.7e-06	69367.4	HUMAN	Serum albumin precursor
P02768	41	62.2	897.366	3	-0.075	RmPCAEDYLSVVLNQLCVLHEK	33.3	0.009	69367.4	HUMAN	Serum albumin precursor
P02768	41	62.2	955.941	2	-0.029	RPCFSALEVDETYVPK	25.4	0.00036	69367.4	HUMAN	Serum albumin precursor
P02768	41	62.2	997.368	3	-0.083	SHCIAEVENDEmPADLPSLAADFVESK	49	8.6e-06	69367.4	HUMAN	Serum albumin precursor
P02768	41	62.2	509.256	2	-0.016	SLHTLFGDK	21.8	0.038	69367.4	HUMAN	Serum albumin precursor
P02768	41	62.2	966.472	2	-0.05	SLHTLFGDKLCTVATLR	28.6	2.7e-05	69367.4	HUMAN	Serum albumin precursor
P02768	41	62.2	749.757	2	-0.036	TCVADESAENCDK	38.8	2.3e-05	69367.4	HUMAN	Serum albumin precursor
P02768	41	62.2	492.748	2	-0.00032	TYETTLEK	18.5	0.075	69367.4	HUMAN	Serum albumin precursor
P02768	41	62.2	1023.01	2	-0.042	VFDEFKPLVEEPQNLIK	37.5	4.5e-06	69367.4	HUMAN	Serum albumin precursor
P02768	41	62.2	756.389	2	-0.036	VPQVSTPTLVEVSR	30.3	8.4e-06	69367.4	HUMAN	Serum albumin precursor
P02768	41	62.2	722.274	2	-0.051	YICENQDSISSK	35.4	2e-06	69367.4	HUMAN	Serum albumin precursor
P02766	6	60.5	1226.07	2	-0.041	ALGISPFHEHAEVVFTANDSGPR	20.1	0.0026	15887.2	HUMAN	Transthyretin precursor
P02766	6	60.5	683.851	2	-0.032	GSPAINVAVHVFR	23.9	0.00012	15887.2	HUMAN	Transthyretin precursor
P02766	6	60.5	747.847	2	-0.083	GSPAINVAVHVFRK	17.9	0.061	15887.2	HUMAN	Transthyretin precursor
P02766	6	60.5	1258.6	2	-0.073	RYTIAALLSPYSYSTTAVVTNPK	26.1	0.00031	15887.2	HUMAN	Transthyretin precursor
P02766	6	60.5	1047.44	3	-0.066	TSESGELHGLTTEEEFVEGIYKVEIDTK	29.1	0.021	15887.2	HUMAN	Transthyretin precursor
P02766	6	60.5	1245.06	2	-0.088	YTIAALLSPYSYSTTAVVTNPKE	35	0.00034	15887.2	HUMAN	Transthyretin precursor
P01620	2	31.2	942.419	2	-0.088	EIVLTQSPGTLSLSPGER	16.9	0.09	11775.2	HUMAN	Ig kappa chain V-III region SIE
P01620	2	31.2	816.817	2	-0.08	FSGSGSGTDFTLTISR	25.5	0.0027	11775.2	HUMAN	Ig kappa chain V-III region SIE
P01876	3	11.6	770.782	2	-0.086	DASGVTFTWTPSSGK	29	0.00014	37655	HUMAN	Ig alpha-1 chain C region
P01876	3	11.6	918.392	2	-0.087	QEPSQGTTTFAVTSILR	24.3	0.0072	37655	HUMAN	Ig alpha-1 chain C region
P01876	3	11.6	466.259	2	-0.018	TPLTATLSK	20.1	0.023	37655	HUMAN	Ig alpha-1 chain C region
Q6IN78	9	26.2	427.185	2	0.97	DTLmISR	18.1	0.0021	50854.2	HUMAN	IGHG1 protein
Q6IN78	9	26.2	936.904	2	-0.084	EPQVYTLPPSRDELTK	24.1	0.0065	50854.2	HUMAN	IGHG1 protein
Q6IN78	9	26.2	839.348	2	-0.057	FNWYVDGVEVHNAK	33.8	4.4e-05	50854.2	HUMAN	IGHG1 protein
Q6IN78	9	26.2	593.791	2	-0.036	GPSVFPLAPSSK	21.6	0.091	50854.2	HUMAN	IGHG1 protein
Q6IN78	9	26.2	581.279	2	-0.04	NQVSLTCLVK	23.6	0.029	50854.2	HUMAN	IGHG1 protein
Q6IN78	9	26.2	684.792	2	-0.059	NTLYLQmNSLR	26.4	0.0025	50854.2	HUMAN	IGHG1 protein
Q6IN78	9	26.2	1069.98	2	-0.042	TPEVTCVVVDVSHEDPEVK	25.6	0.0041	50854.2	HUMAN	IGHG1 protein
Q6IN78	9	26.2	937.388	2	-0.076	TTPPVLDSDGSFFLYSK	31.8	0.0001	50854.2	HUMAN	IGHG1 protein
Q6IN78	9	26.2	904.439	2	-0.068	VVSVLTVLHQDWLNGK	24	0.00088	50854.2	HUMAN	IGHG1 protein
Q6GMV9	8	43.4	751.803	2	-0.08	DSTYSLSSTLTLSK	32.4	0.00043	25646.1	HUMAN	IGKC protein
Q6GMV9	8	43.4	816.817	2	-0.08	FSGSGSGTDFTLTISR	25.5	0.0027	25646.1	HUMAN	IGKC protein
Q6GMV9	8	43.4	1051.52	2	-0.052	RTVAAPSVFIFPPSDEQLK	23.9	0.034	25646.1	HUMAN	IGKC protein
Q6GMV9	8	43.4	899.386	2	-0.065	SGTASVVCLLNNFYPR	20.6	0.096	25646.1	HUMAN	IGKC protein
Q6GMV9	8	43.4	973.432	2	-0.085	TVAAPSVFIFPPSDEQLK	24	0.011	25646.1	HUMAN	IGKC protein
Q6GMV9	8	43.4	1068.41	2	-0.076	VDNALQSGNSQESVTEQDSK	38.9	3.8e-06	25646.1	HUMAN	IGKC protein
Q6GMV9	8	43.4	1207.2	3	-0.044	VDNALQSGNSQESVTEQDSKDSTYSLSSTLTLSK	30.4	0.0021	25646.1	HUMAN	IGKC protein
Q6GMV9	8	43.4	938.37	2	-0.097	VYACEVTHQGLSSPVTK	20.3	0.014	25646.1	HUMAN	IGKC protein
P68871	9	70.7	1037.89	2	-0.083	FFESFGDLSTPDAVmGNPK	32.1	2.1e-06	15998.5	HUMAN	Hemoglobin subunit beta
P68871	9	70.7	862.689	3	-0.063	GTFATLSELHCDKLHVDPENFR	31.5	0.019	15998.5	HUMAN	Hemoglobin subunit beta
P68871	9	70.7	899.462	2	-0.034	KVLGAFSDGLAHLDNLK	31.8	0.00015	15998.5	HUMAN	Hemoglobin subunit beta
P68871	9	70.7	639.302	2	1.4	LLVVYPWTQR	22.3	0.00017	15998.5	HUMAN	Hemoglobin subunit beta
P68871	9	70.7	476.721	2	-0.038	VHLTPEEK	19.8	0.05	15998.5	HUMAN	Hemoglobin subunit beta
P68871	9	70.7	835.395	2	-0.054	VLGAFSDGLAHLDNLK	33.1	0.00016	15998.5	HUMAN	Hemoglobin subunit beta
P68871	9	70.7	657.798	2	-0.038	VNVDEVGGEALGR	35.8	0.00016	15998.5	HUMAN	Hemoglobin subunit beta
P68871	9	70.7	575.281	2	-0.06	VVAGVANALAHK	29.1	0.0016	15998.5	HUMAN	Hemoglobin subunit beta
P68871	9	70.7	725.359	2	-0.043	VVAGVANALAHKYH	23.7	0.0016	15998.5	HUMAN	Hemoglobin subunit beta
P69905	7	67.6	786.371	2	-0.072	FLASVSTVLTSKYR	23.8	0.0027	15257.7	HUMAN	Hemoglobin subunit alpha
P69905	7	67.6	544.266	2	-0.012	mFLSFPTTK	20.4	0.00017	15257.7	HUMAN	Hemoglobin subunit alpha
P69905	7	67.6	917.396	2	-0.053	TYFPHFDLSHGSAQVK	21.4	0.003	15257.7	HUMAN	Hemoglobin subunit alpha
P69905	7	67.6	1004.79	3	-0.04	VADALTNAVAHVDDmPNALSALSDLHAHK	21.2	0.064	15257.7	HUMAN	Hemoglobin subunit alpha
P69905	7	67.6	1094.51	3	-0.05	VADALTNAVAHVDDmPNALSALSDLHAHKLR	23.3	0.025	15257.7	HUMAN	Hemoglobin subunit alpha
P69905	7	67.6	765.322	2	-0.049	VGAHAGEYGAEALER	41.8	4.9e-06	15257.7	HUMAN	Hemoglobin subunit alpha
P69905	7	67.6	585.812	2	-0.53	VLSPADKTNVK	19.8	0.02	15257.7	HUMAN	Hemoglobin subunit alpha
P02787	12	23.2	1318.61	3	-0.065	AIAANEADAVTLDAGLVYDAYLAPNNLKPVVAEFYGSK	34.6	9.1e-05	77050.6	HUMAN	Serotransferrin precursor
P02787	12	23.2	482.757	2	-0.013	APNHAVVTR	25.6	0.0079	77050.6	HUMAN	Serotransferrin precursor
P02787	12	23.2	489.733	2	-0.015	DGAGDVAFVK	34.9	0.0056	77050.6	HUMAN	Serotransferrin precursor
P02787	12	23.2	783.374	2	-0.029	DLLFRDDTVCLAK	24.1	0.027	77050.6	HUMAN	Serotransferrin precursor
P02787	12	23.2	606.23	2	-0.047	DSGFQmNQLR	26.9	0.093	77050.6	HUMAN	Serotransferrin precursor
P02787	12	23.2	815.326	2	-0.086	EDPQTFYYAVAVVK	31.8	0.0034	77050.6	HUMAN	Serotransferrin precursor
P02787	12	23.2	638.795	2	-0.024	EFQLFSSPHGK	18.9	0.075	77050.6	HUMAN	Serotransferrin precursor
P02787	12	23.2	642.244	2	-0.044	EGYYGYTGAFR	22.8	0.0012	77050.6	HUMAN	Serotransferrin precursor
P02787	12	23.2	637.321	2	-0.0095	HSTIFENLANK	37.8	1.6e-05	77050.6	HUMAN	Serotransferrin precursor
P02787	12	23.2	1095.95	2	-0.056	ImNGEADAmSLDGGFVYIAGK	46.3	1.8e-05	77050.6	HUMAN	Serotransferrin precursor
P02787	12	23.2	747.815	2	-0.054	mYLGYEYVTAIR	41.6	6.9e-06	77050.6	HUMAN	Serotransferrin precursor
P02787	12	23.2	746.334	2	-0.049	SKEFQLFSSPHGK	29.3	7.1e-05	77050.6	HUMAN	Serotransferrin precursor
P02647	9	28.1	608.297	2	-0.018	ATEHLSTLSEK	21.8	0.011	30778.1	HUMAN	Apolipoprotein A-I precursor
P02647	9	28.1	618.266	2	-0.082	DLATVYVDVLK	33.4	0.00068	30778.1	HUMAN	Apolipoprotein A-I precursor
P02647	9	28.1	908.405	2	-0.024	DSGRDYVSQFEGSALGK	35.2	6.5e-05	30778.1	HUMAN	Apolipoprotein A-I precursor
P02647	9	28.1	700.793	2	-0.046	DYVSQFEGSALGK	37.5	1.7e-05	30778.1	HUMAN	Apolipoprotein A-I precursor
P02647	9	28.1	579.28	2	-0.038	LEALKENGGAR	22.6	0.047	30778.1	HUMAN	Apolipoprotein A-I precursor
P02647	9	28.1	615.813	2	-0.046	QGLLPVLESFK	18.4	0.036	30778.1	HUMAN	Apolipoprotein A-I precursor
P02647	9	28.1	607.209	2	-0.14	qGLLPVLESFK	21.6	0.012	30778.1	HUMAN	Apolipoprotein A-I precursor
P02647	9	28.1	731.889	2	-0.04	VKDLATVYVDVLK	27.4	0.0082	30778.1	HUMAN	Apolipoprotein A-I precursor
P02647	9	28.1	692.801	2	-1.1	VSFLSALEEYTK	29.8	8.3e-07	30778.1	HUMAN	Apolipoprotein A-I precursor
P02649	1	4.7	749.302	2	-0.1	AATVGSLAGQPLQER	23.3	0.019	36154.4	HUMAN	Apolipoprotein E precursor
P00450	1	1.1	760.324	2	-0.051	ALYLQYTDETFR	29.2	0.0015	122206	HUMAN	Ceruloplasmin precursor
P00738	2	6.9	645.751	2	-0.12	DIAPTLTLYVGK	23.4	0.013	45205.7	HUMAN	Haptoglobin precursor
P00738	2	6.9	925.904	2	-0.056	VmPICLPSKDYAEVGR	21.5	0.031	45205.7	HUMAN	Haptoglobin precursor
P02679	2	4.9	575.706	2	-0.052	TSTADYAmFK	19.3	0.019	51512.1	HUMAN	Fibrinogen gamma chain precursor
P02679	2	4.9	757.313	2	-0.054	YLQEIYNSNNQK	33.4	0.01	51512.1	HUMAN	Fibrinogen gamma chain precursor
Q6GTG1	5	13.7	677.822	2	-0.06	AKLPDATPTELAK	18.3	0.043	52937.1	HUMAN	Group-specific component
Q6GTG1	5	13.7	847.887	2	-0.073	KFPSGTFEQVSQLVK	23.5	0.005	52937.1	HUMAN	Group-specific component
Q6GTG1	5	13.7	1403.69	2	-0.087	LAQKVPTADLEDVLPLAEDITNILSK	22.7	0.0045	52937.1	HUMAN	Group-specific component
Q6GTG1	5	13.7	702.811	2	-0.034	VmDKYTFELSR	26.8	0.00035	52937.1	HUMAN	Group-specific component
Q6GTG1	5	13.7	1183.54	2	-0.099	VPTADLEDVLPLAEDITNILSK	30.1	0.002	52937.1	HUMAN	Group-specific component
P15090	2	15.9	1149.94	2	-0.1	NTEISFILGQEFDEVTADDR	28.8	0.002	14719	HUMAN	Fatty acid-binding protein, adipocyte
P15090	2	15.9	1214.01	2	-0.073	NTEISFILGQEFDEVTADDRK	25.9	0.0038	14719	HUMAN	Fatty acid-binding protein, adipocyte
P31151	2	30.7	628.754	2	-0.058	GTNYLADVFEK	20.5	0.011	11457.1	HUMAN	Protein S100-A7
P31151	2	30.7	1156.51	2	-0.089	KIDFSEFLSLLGDIATDYHK	29.7	0.00024	11457.1	HUMAN	Protein S100-A7
P02763	3	18.9	871.823	2	-0.083	EQLGEFYEALDCLR	25.4	0.0014	23511.8	HUMAN	Alpha-1-acid glycoprotein 1 precursor
P02763	3	18.9	580.731	2	-0.067	WFYIASAFR	26.5	0.00084	23511.8	HUMAN	Alpha-1-acid glycoprotein 1 precursor
P02763	3	18.9	876.917	2	-0.064	YVGGQEHFAHLLILR	31.5	0.00072	23511.8	HUMAN	Alpha-1-acid glycoprotein 1 precursor
P25311	2	11.2	1202.05	2	-0.062	HVEDVPAFQALGSLNDLQFFR	32	1e-05	33872.5	HUMAN	Zinc-alpha-2-glycoprotein precursor
P25311	2	11.2	704.778	2	-0.093	YSLTYIYTGLSK	25	0.0038	33872.5	HUMAN	Zinc-alpha-2-glycoprotein precursor
P02790	3	6.9	571.268	2	-0.03	GGYTLVSGYPK	27.5	0.0052	51676.8	HUMAN	Hemopexin precursor
P02790	3	6.9	610.755	2	-0.052	NFPSPVDAAFR	21.7	0.024	51676.8	HUMAN	Hemopexin precursor
P02790	3	6.9	563.311	2	0.0049	qGHNSVFLIK	26.1	0.043	51676.8	HUMAN	Hemopexin precursor
P19652	1	9.5	617.838	2	-0.018	EHVAHLLFLR	26.2	0.0011	23602.8	HUMAN	Alpha-1-acid glycoprotein 2 precursor
P01024	3	3.1	830.828	2	1.4	AGDFLEANYmNLQR	24	0.0006	187150	HUMAN	Complement C3 precursor
P01024	3	3.1	1222.55	2	-0.1	EPGQDLVVLPLSITTDFIPSFR	26.7	0.00039	187150	HUMAN	Complement C3 precursor
P01024	3	3.1	908.884	2	-0.066	SNLDEDIIAEENIVSR	43.1	0.00032	187150	HUMAN	Complement C3 precursor
P10909	1	3.8	937.388	2	-0.11	LFDSDPITVTVPVEVSR	24.3	0.0064	52495.1	HUMAN	Clusterin precursor
P60709	12	47.5	488.714	2	-0.013	AGFAGDDAPR	25.6	0.038	41737.1	HUMAN	Actin, cytoplasmic 1
P60709	12	47.5	1115.93	2	-0.11	DLYANTVLSGGTTmYPGIADR	24.2	0.00073	41737.1	HUMAN	Actin, cytoplasmic 1
P60709	12	47.5	677.76	2	-0.055	DSYVGDEAQSKR	26.7	0.00044	41737.1	HUMAN	Actin, cytoplasmic 1
P60709	12	47.5	589.264	2	-0.047	EITALAPSTmK	23.1	0.016	41737.1	HUMAN	Actin, cytoplasmic 1
P60709	12	47.5	566.734	2	-0.034	GYSFTTTAER	27.5	0.0017	41737.1	HUMAN	Actin, cytoplasmic 1
P60709	12	47.5	760.333	2	2	IWHHTFYNELR	20.9	0.0095	41737.1	HUMAN	Actin, cytoplasmic 1
P60709	12	47.5	1283.49	2	-0.1	LCYVALDFEQEmATAASSSSLEK	33	7.1e-07	41737.1	HUMAN	Actin, cytoplasmic 1
P60709	12	47.5	790.83	2	-0.075	mQKEITALAPSTmK	24.4	0.0011	41737.1	HUMAN	Actin, cytoplasmic 1
P60709	12	47.5	750.288	2	-0.053	qEYDESGPSIVHR	18.8	0.041	41737.1	HUMAN	Actin, cytoplasmic 1
P60709	12	47.5	895.864	2	-0.086	SYELPDGQVITIGNER	30.2	0.0026	41737.1	HUMAN	Actin, cytoplasmic 1
P60709	12	47.5	1067.14	3	-0.066	TTGIVmDSGDGVTHTVPIYEGYALPHAILR	27.1	0.048	41737.1	HUMAN	Actin, cytoplasmic 1
P60709	12	47.5	977.478	2	-0.058	VAPEEHPVLLTEAPLNPK	35.2	6.8e-06	41737.1	HUMAN	Actin, cytoplasmic 1
Q02413	2	3.3	1022.95	2	-0.11	ISGVGIDQPPYGIFVINQK	27.3	0.00045	113716	HUMAN	Desmoglein-1 precursor
Q02413	2	3.3	875.864	2	-0.061	YVmGNNPADLLAVDSR	36.3	3.5e-05	113716	HUMAN	Desmoglein-1 precursor
Q5D862	1	0.5	635.24	2	-0.12	SVVTVIDVFYK	29.9	0.0011	248074	HUMAN	Ifapsoriasin
Q13748	3	11.6	729.341	2	-0.097	LIGQIVSSITASLR	34.7	6.9e-06	49960	HUMAN	Tubulin alpha-3C/D chain
Q13748	3	11.6	1004.4	2	-0.052	TIGGGDDSFNTFFSETGAGK	20	0.0036	49960	HUMAN	Tubulin alpha-3C/D chain
Q13748	3	11.6	912.911	2	-0.085	VGINYQPPTVVPGGDLAK	24.6	0.013	49960	HUMAN	Tubulin alpha-3C/D chain
Q13509	3	8.9	816.315	2	-0.1	AILVDLEPGTmDSVR	26.1	0.0012	50433.2	HUMAN	Tubulin beta-3 chain
Q13509	3	8.9	854.36	2	-0.075	ALTVPELTQQmFDAK	29.7	0.00065	50433.2	HUMAN	Tubulin beta-3 chain
Q13509	3	8.9	581.271	2	0.95	LAVNmVPFPR	26.7	7.7e-05	50433.2	HUMAN	Tubulin beta-3 chain
P68371	1	8.8	818.871	2	-0.048	LHFFmPGFAPLTSR	28.2	0.0013	49831.5	HUMAN	Tubulin beta-2C chain
P51884	2	8.3	979	2	-0.054	LPSGLPVSLLTLYLDNNK	31.8	2.3e-05	38429.3	HUMAN	Lumican precursor
P51884	2	8.3	1055.2	3	-0.031	LPSGLPVSLLTLYLDNNKISNIPDEYFK	28.1	0.017	38429.3	HUMAN	Lumican precursor
P08107	1	2	744.262	2	-0.093	TTPSYVAFTDTER	22.1	0.019	70052.8	HUMAN	Heat shock 70 kDa protein 1
P11142	4	9.3	894.424	2	-0.075	IINEPTAAAIAYGLDKK	23.4	0.0034	70898.7	HUMAN	Heat shock cognate 71 kDa protein
P11142	4	9.3	741.343	2	-0.064	SQIHDIVLVGGSTR	31.3	0.00012	70898.7	HUMAN	Heat shock cognate 71 kDa protein
P11142	4	9.3	846.328	2	-0.038	STAGDTHLGGEDFDNR	23.3	0.006	70898.7	HUMAN	Heat shock cognate 71 kDa protein
P11142	4	9.3	744.262	2	-0.093	TTPSYVAFTDTER	22.1	0.019	70898.7	HUMAN	Heat shock cognate 71 kDa protein
P16104	1	16.1	1136.07	2	-0.12	LLGGVTIAQGGVLPNIQAVLLPK	26.8	0.0011	15144.7	HUMAN	Histone H2A.x
P62805	4	43.7	567.747	2	-0.028	DAVTYTEHAK	24.8	0.02	11367.4	HUMAN	Histone H4
P62805	4	43.7	789.376	2	-0.072	ISGLIYEETRGVLK	24.3	0.079	11367.4	HUMAN	Histone H4
P62805	4	43.7	741.842	2	-0.06	TVTAmDVVYALKR	25.8	0.0004	11367.4	HUMAN	Histone H4
P62805	4	43.7	702.311	3	-0.062	VFLENVIRDAVTYTEHAK	31.1	0.02	11367.4	HUMAN	Histone H4
P32119	3	14.6	867.876	2	-0.11	EGGLGPLNIPLLADVTR	23.4	0.025	21892.1	HUMAN	Peroxiredoxin-2
P32119	3	14.6	931.999	2	-0.039	KEGGLGPLNIPLLADVTR	23.8	0.0034	21892.1	HUMAN	Peroxiredoxin-2
P32119	3	14.6	604.755	2	-1.6	QITVNDLPVGR	22.8	0.022	21892.1	HUMAN	Peroxiredoxin-2
P62937	2	18.8	769.302	2	-0.069	VKEGmNIVEAmER	22.6	0.0014	18012.7	HUMAN	Peptidyl-prolyl cis-trans isomerase A
P62937	2	18.8	973.395	2	-0.11	VNPTVFFDIAVDGEPLGR	31.7	0.00067	18012.7	HUMAN	Peptidyl-prolyl cis-trans isomerase A
P00915	7	33	601.77	2	-0.074	ADGLAVIGVLmK	28.2	0.0062	28870.4	HUMAN	Carbonic anhydrase 1
P00915	7	33	1128.48	2	-0.047	EIINVGHSFHVNFEDNDNR	21.9	0.013	28870.4	HUMAN	Carbonic anhydrase 1
P00915	7	33	964.93	2	-0.078	HDTSLKPISVSYNPATAK	24.9	0.0042	28870.4	HUMAN	Carbonic anhydrase 1
P00915	7	33	871.861	2	-0.097	LYPIANGNNQSPVDIK	22.3	0.035	28870.4	HUMAN	Carbonic anhydrase 1
P00915	7	33	485.772	2	-0.028	VLDALQAIK	30.5	0.047	28870.4	HUMAN	Carbonic anhydrase 1
P00915	7	33	600.286	2	-0.086	VLDALQAIKTK	23.3	0.024	28870.4	HUMAN	Carbonic anhydrase 1
P00915	7	33	513.735	2	-0.023	YSSLAEAASK	21.2	0.042	28870.4	HUMAN	Carbonic anhydrase 1
P00918	1	6.2	834.877	2	-0.11	AVQQPDGLAVLGIFLK	29.9	6.2e-05	29246.3	HUMAN	Carbonic anhydrase 2
P25705	4	9.8	777.316	2	-0.057	EAYPGDVFYLHSR	24.5	0.0011	59751.1	HUMAN	ATP synthase subunit alpha, mitochondrial precursor
P25705	4	9.8	1052.45	2	-0.07	GMSLNLEPDNVGVVVFGNDK	19	0.016	59751.1	HUMAN	ATP synthase subunit alpha, mitochondrial precursor
P25705	4	9.8	644.3	2	-0.051	HALIIYDDLSK	29.9	0.00037	59751.1	HUMAN	ATP synthase subunit alpha, mitochondrial precursor
P25705	4	9.8	500.737	2	-0.056	VLSIGDGIAR	29.9	0.033	59751.1	HUMAN	ATP synthase subunit alpha, mitochondrial precursor
P07339	1	3.2	801.351	2	-0.069	LVDQNIFSFYLSR	29.2	0.0041	44552.6	HUMAN	Cathepsin D precursor
